# Supplementary material for: Hybrid luminescent porous silicon for efficient drug loading and release
Source: Royal Society of Chemistry journal article supplement (doi:10.1039/c6ra27102b), 2017-01-01
Supplement: c6ra27102b1.pdf [file c6ra27102b1.pdf]

Electronic Supplementary Information (ESI)

**Hybrid luminescent porous silicon for efficient drug loading and release**

*Ali Ghafarinazari<sup>1</sup>, Marina Scarpa<sup>2</sup>, Gianni Zoccatelli<sup>3</sup>, Mauro Comes Franchini<sup>4</sup>, Erica Locatelli<sup>4</sup>, Nicola Daldosso<sup>1</sup>*

<sup>1</sup> *Fluorescence Laboratory, Department of Computer Science, University of Verona, Strada le Grazie 15, 37134 Verona, Italy*

<sup>2</sup> *Department of Physics and Istituto Nazionale Biostrutture Biosistemi, University of Trento, Via Sommarive 13, 38123 Trento, Italy*

<sup>3</sup> *Department of Biotechnology, University of Verona, Strada le Grazie 15, 37134 Verona, Italy*

<sup>4</sup> *Department of Industrial Chemistry, University of Bologna, Viale Risorgimento 4, 40136 Bologna, Italy*

Email: nicola.daldosso@univr.it (Nicola Daldosso)

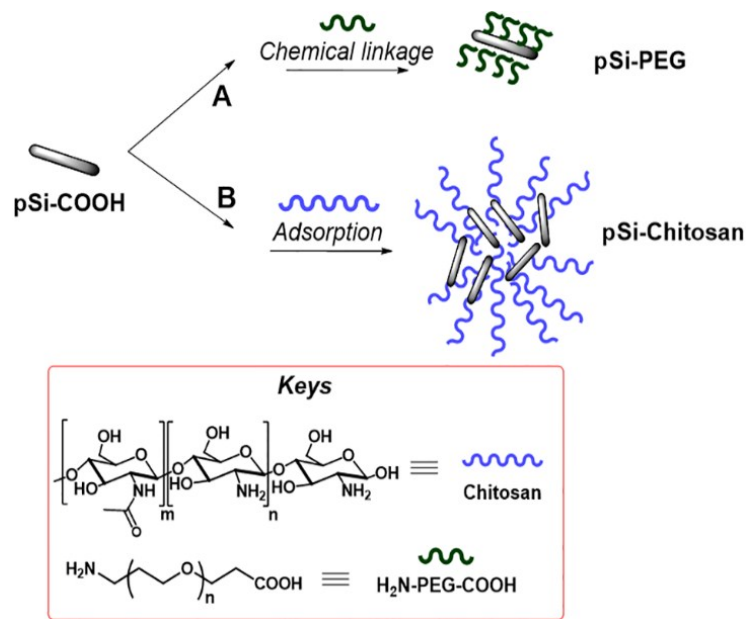

**Figure S1.** Schematic representation of the pSi surface functionalization procedure.

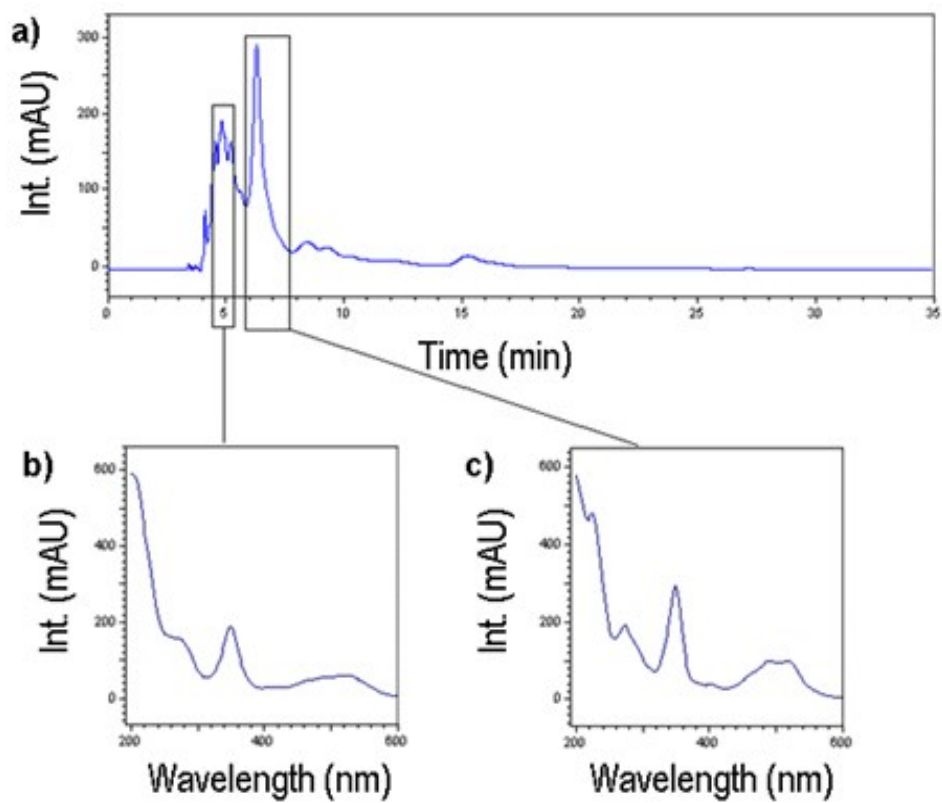

**Figure S2.** HPLC trace of compounds released from hydroxocobalamin (OH-Cbi) by UV detection at 168 – 351 nm (a). Optical density at times of 289 s (b) and 380 s (c).

---

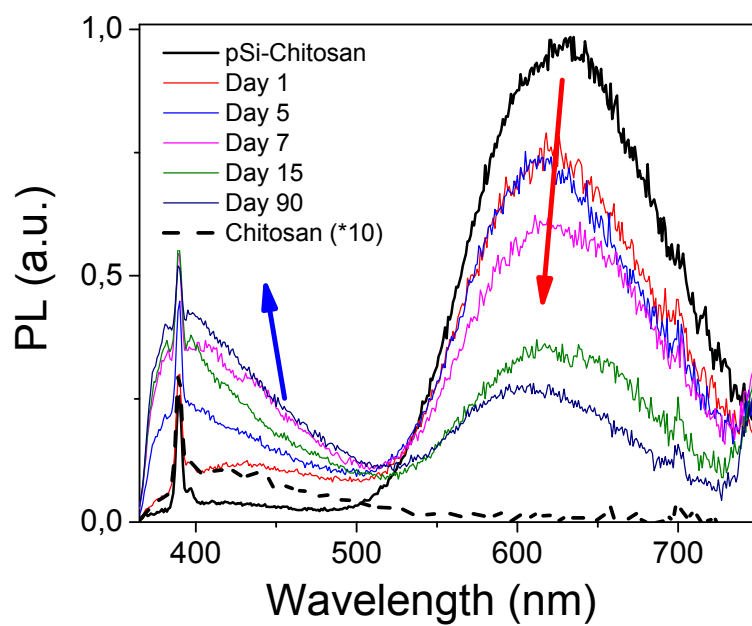

**Figure S3.** Optical emission spectra of pSi-Chitosan sample after suspension in PBS as a function of time (after 1 day and up to 90 days).

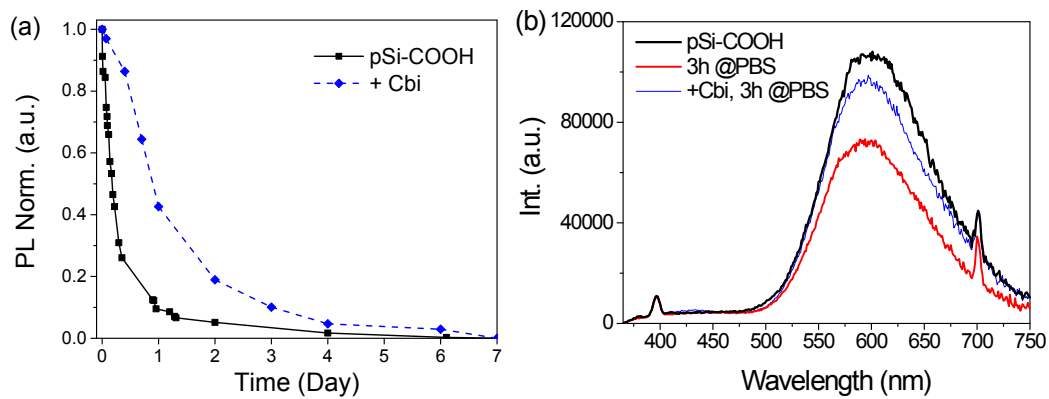

**Figure S4.** a) influence of Cbi loading on reduction of pSi-COOH PL intensity into PBS. b) PL spectrum of pSi-COOH initially and after 3 h of incubation in PBS, and effect of Cbi loading.
